# Supplementary material
Source: Springer Nature journal article supplement (https://www.springermedizin.de/resource/supplementary/12879_2012_2053_MOESM1_ESM.pdf/9443660)
Supplement: MOESM1 [file 9443660]

**Q-fever cohort**  
meeting the Dutch notification criteria

Onset of illness in 2007-2008  
N= roughly 400

Onset of illness in 2010-2011  
N=337

Questionnaires:  
NCSI at 12-26 months (Morroy et al. 2011)  
NCSI at 48 months

Questionnaires:  
NCSI at 3,12,18 and 24 months  
SF-36 at 3, 6, 9, 12, 18 and 24 months

**Reference groups**

Healthy controls

N=130

Legionnaires'  
disease (2010)

N=190

Q-fever with a-specific  
symptoms (2007-2009)

N=roughly 180

Questionnaires:  
NCSI  
SF-36

Questionnaires:  
NCSI at 12 months  
SF-36 at 12 months

Questionnaire:  
NCSI 4 years after diagnosis
